# Supplementary material for: A Possible Primordial Acetyleno/Carboxydotrophic Core Metabolism
Source: MDPI journal article supplement (doi:10.3390/life10040035), 2020-04-07
Supplement: s1 [file s1]

## Supplementary Information

### A Possible Primordial Acetyleno/Carboxydutrophic Core Metabolism

Jessica Sobotta<sup>†</sup>, Thomas Geisberger<sup>†</sup>, Carolin Moosmann, Christopher M. Scheidler, Wolfgang Eisenreich, Günter Wächtershäuser, Claudia Huber<sup>\*</sup>

Table S1: Metabolic products of the nickel catalyzed reaction of acetylene with carbon monoxide

Figure S1: Formation of methyl thioacetate (thioacetic acid S-methyl ester) from  $\text{HC}\equiv\text{CH}$  and  $\text{CH}_3\text{SH}$  in the presence of NiS

Figure S2: Comparison of the Reductive acetyl-CoA pathway<sup>4</sup> and the proposed primordial reaction mechanism to thio acetate

Figure S3: Reductive tricarboxylic acid cycle

Figure S4: 3-Hydroxpropionate/4-hydroxybutyrate cycle

Figure S5: Dicarboxylate/4-Hydroxybutyrate cycle

Figure S6: 3-Hydroxypropionate bicycle

Additional references: [39-44]

**Table S1: Metabolic products of the nickel catalyzed reaction of acetylene with carbon monoxide.**

Reactions were carried out in 125 ml serum bottles with 5 ml aqueous liquid phase for 7 days at 105 °C; Products were identified by GC-MS as *tert*-butyldimethylsilyl derivatives; Labelling in characteristic fragments is shown for runs with D<sub>2</sub>O or <sup>13</sup>CO. n<sup>^</sup> signifies n D-labels, n<sup>•</sup> signifies n <sup>13</sup>C-labels, 0.5<sup>•</sup> signifies 50% labelling of the indicated product.

| <b>Runs</b>                                   | <b>A</b>     | <b>B</b>     | <b>C</b>    | <b>D</b>    |                                       |                      |                      |
|-----------------------------------------------|--------------|--------------|-------------|-------------|---------------------------------------|----------------------|----------------------|
| NiSO <sub>4</sub> • 6 H <sub>2</sub> O [mmol] | 1            | 0.5          |             | 0.5         |                                       |                      |                      |
| FeSO <sub>4</sub> • 7 H <sub>2</sub> O [mmol] |              |              |             | 0.5         |                                       |                      |                      |
| β-Ni(OH) <sub>2</sub> [mmol]                  | -            | 0.5          | 1           | -           |                                       |                      |                      |
| Na <sub>2</sub> SO <sub>4</sub> [mmol]        | -            | 0.5          | 1           | -           |                                       |                      |                      |
| Na <sub>2</sub> S • 9 H <sub>2</sub> O [mmol] | 1            | 0.5          | -           | 1.0         |                                       |                      |                      |
| NaOH [mmol]                                   | 0.5          | 0.5          | 0.5         | 0.5         |                                       |                      |                      |
| CO [ml]                                       | 60           | 60           | 60          | 60          |                                       |                      |                      |
| C <sub>2</sub> H <sub>2</sub> [ml]            | 60           | 60           | 60          | 60          |                                       |                      |                      |
| pH <sub>end</sub>                             | 8.0          | 8.1          | 9.8         | 8.5         |                                       |                      |                      |
|                                               |              |              |             |             |                                       |                      |                      |
| <b>Products [μM]</b>                          |              |              |             |             | labelling in characteristic fragments |                      |                      |
|                                               |              |              |             |             | mass1                                 | mass2                | mass3                |
| <b>C1</b>                                     |              |              |             |             |                                       |                      |                      |
| formate                                       | <b>18983</b> | <b>24207</b> | <b>310</b>  | <b>434</b>  | 145_1 <sup>^1•</sup>                  | 103_1 <sup>^1•</sup> |                      |
| <b>C2</b>                                     |              |              |             |             |                                       |                      |                      |
| acetate                                       | <b>4358</b>  | <b>3434</b>  | <b>112</b>  | <b>749</b>  | 117_3 <sup>^0•</sup>                  | 99_0 <sup>^0•</sup>  | 75_1 <sup>^0•</sup>  |
| glycolate                                     | <b>32</b>    | <b>38</b>    | <b>n.d.</b> | <b>11</b>   | 247_2 <sup>^0•</sup>                  | 219_2 <sup>^0•</sup> | 163_2 <sup>^0•</sup> |
| <b>C3</b>                                     |              |              |             |             |                                       |                      |                      |
| acrylate                                      | <b>9692</b>  | <b>16874</b> | <b>243</b>  | <b>763</b>  | 129_3 <sup>^1•</sup>                  | 99_1 <sup>^1•</sup>  | 85_3 <sup>^0•</sup>  |
| propionate                                    | <b>10368</b> | <b>15021</b> | <b>171</b>  | <b>339</b>  | 131_5 <sup>^1•</sup>                  | 115_0 <sup>^0•</sup> | 173_5 <sup>^1•</sup> |
| pyruvate                                      | <b>43</b>    | <b>117</b>   | <b>n.d.</b> | <b>4</b>    | 259_2 <sup>^0.5•</sup>                | 231_0 <sup>^0•</sup> | 189_0 <sup>^0•</sup> |
| β-lactate                                     | <b>273</b>   | <b>793</b>   | <b>n.d.</b> | <b>n.d.</b> | 261_4 <sup>^1•</sup>                  | 219_3 <sup>^0•</sup> | 163_2 <sup>^0•</sup> |
| glycerate                                     | <b>108</b>   | <b>102</b>   | <b>n.d.</b> | <b>n.d.</b> | 391_3 <sup>^0.5•</sup>                | 363_3 <sup>^0•</sup> | 289_3 <sup>^0•</sup> |
| <b>C4</b>                                     |              |              |             |             |                                       |                      |                      |
| but-3-enoate                                  | <b>187</b>   | <b>563</b>   | <b>n.d.</b> | <b>n.d.</b> | 143_5 <sup>^1•</sup>                  | 115_0 <sup>^0•</sup> | 99_5 <sup>^0•</sup>  |
| crotonate                                     | <b>226</b>   | <b>516</b>   | <b>n.d.</b> | <b>22</b>   | 143_5 <sup>^0.5•</sup>                | 99_5 <sup>^0•</sup>  | 185_0 <sup>^1•</sup> |
| 2-methylmalonate                              | <b>48</b>    | <b>145</b>   | <b>n.d.</b> | <b>n.d.</b> | 289_3 <sup>^2•</sup>                  | 331_0 <sup>^2•</sup> | 133_0 <sup>^0•</sup> |
| maleate                                       | <b>72</b>    | <b>585</b>   | <b>n.d.</b> | <b>14</b>   | 287_2 <sup>^2•</sup>                  | 329_2 <sup>^2•</sup> | 115_0 <sup>^1•</sup> |
| succinate                                     | <b>3964</b>  | <b>4747</b>  | <b>3</b>    | <b>187</b>  | 289_4 <sup>^2•</sup>                  | 331_4 <sup>^2•</sup> | 215_4 <sup>^2•</sup> |
| fumarate                                      | <b>358</b>   | <b>391</b>   | <b>n.d.</b> | <b>12</b>   | 287_2 <sup>^2•</sup>                  | 245_2 <sup>^2•</sup> | 329_2 <sup>^2•</sup> |
| 2,3-dihydroxybutyrate                         | <b>31</b>    | <b>41</b>    | <b>n.d.</b> | <b>n.d.</b> | 405_5 <sup>^1•</sup>                  | 377_5 <sup>^0•</sup> | 303_5 <sup>^0•</sup> |
| malate                                        | <b>17</b>    | <b>85</b>    | <b>n.d.</b> | <b>n.d.</b> | 419_3 <sup>^2•</sup>                  | 287_2 <sup>^2•</sup> | 461_3 <sup>^0•</sup> |
| <b>C5</b>                                     |              |              |             |             |                                       |                      |                      |
| (E)-2-methylbut-2-enoate                      | <b>196</b>   | <b>411</b>   | <b>n.d.</b> | <b>n.d.</b> | 157_7 <sup>^1•</sup>                  | 113_7 <sup>^0•</sup> | 83_7 <sup>^1•</sup>  |

Mass spectrum of methyl thioacetate (thioacetic acid S-methyl ester) standard sample

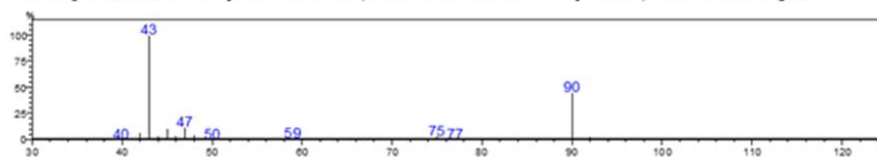

Mass spectrum of methyl thioacetate from run A Table S2.

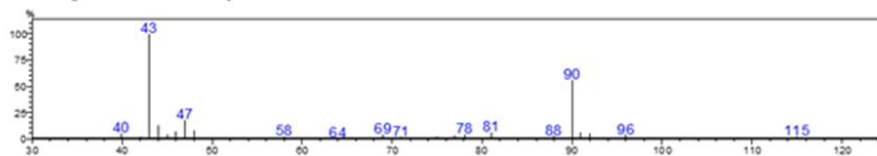

Mass spectrum of methyl thioacetate from run B Table S2.

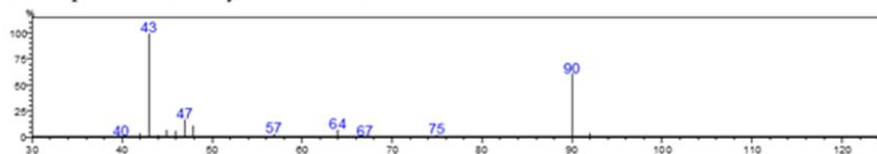

Mass spectrum of methyl thioacetate from run A Table S2 performed in D<sub>2</sub>O.

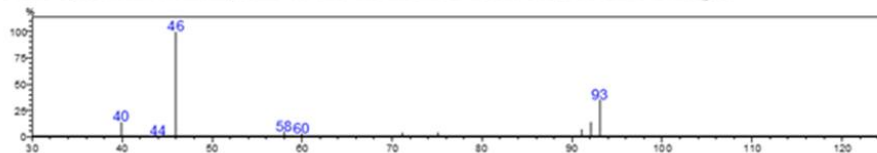

Mass spectrum of methyl thioacetate from run B Table S2 performed with <sup>13</sup>CO.

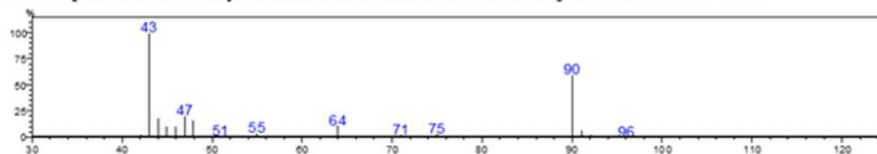

**Figure S1: Formation of methyl thioacetate (thioacetic acid S-methyl ester) from HC≡CH and CH<sub>3</sub>SH in the presence of NiS.** Mass spectra are shown for the acetyl thioester standard sample as well as for experiments with HC≡CH (Table 3 run A), HC≡CH + CO (Table 3 run B), D<sub>2</sub>O and <sup>13</sup>CO.

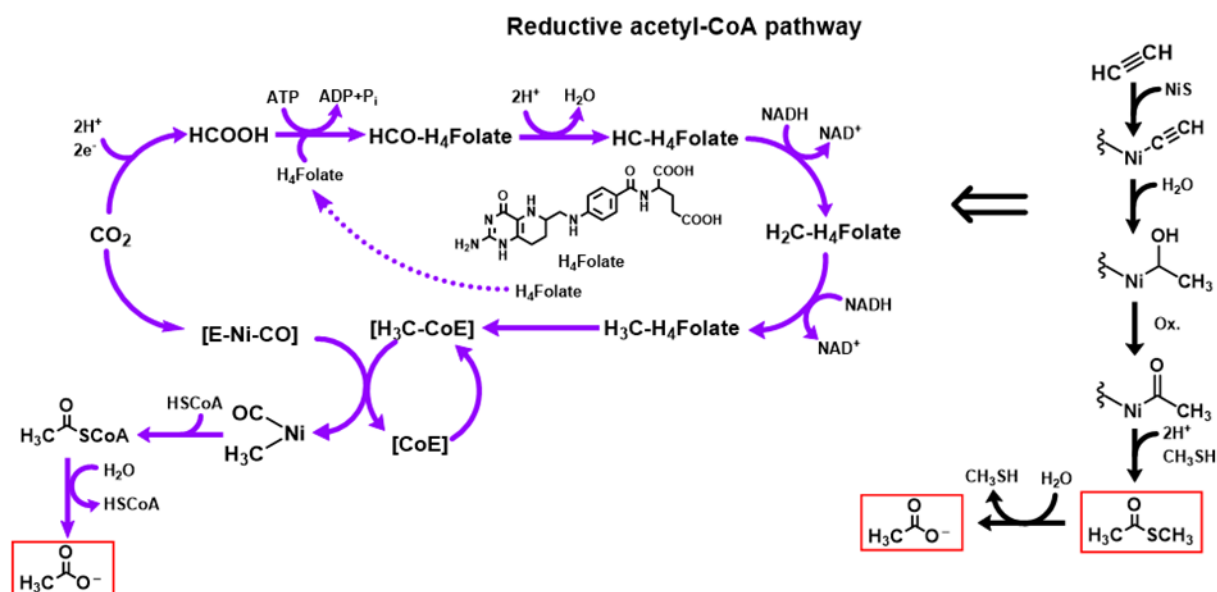

**Figure S2: Comparison of the Reductive acetyl-CoA pathway<sup>11</sup> and the proposed primordial reaction mechanism to thio acetate.** Metabolites highlighted by red boxes correspond to products of the  $\text{NiS}/\text{HC}\equiv\text{CH}/\text{CO}$  system. Pathway is adapted from<sup>11,39</sup>. CoE stands for corrinoid Enzyme,  $\text{H}_3\text{C-CoE}$  for methyl corrinoid protein; E-Ni-CO for CO dehydrogenase complex.

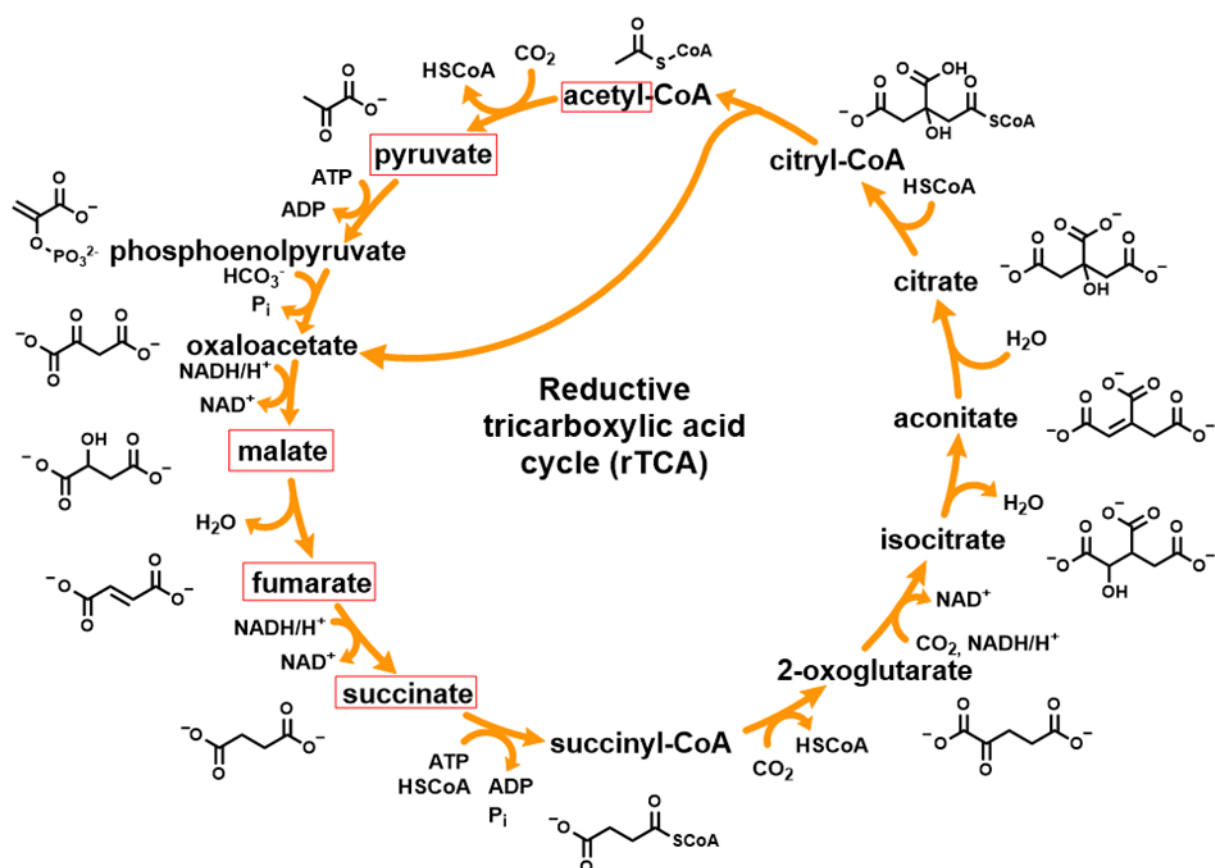

**Figure S3: Reductive tricarboxylic acid cycle<sup>14</sup>.** Metabolites highlighted by red boxes correspond to products of the  $\text{NiS}/\text{HC}\equiv\text{CH}/\text{CO}$  system. Graphics partly adapted from<sup>40,41</sup>

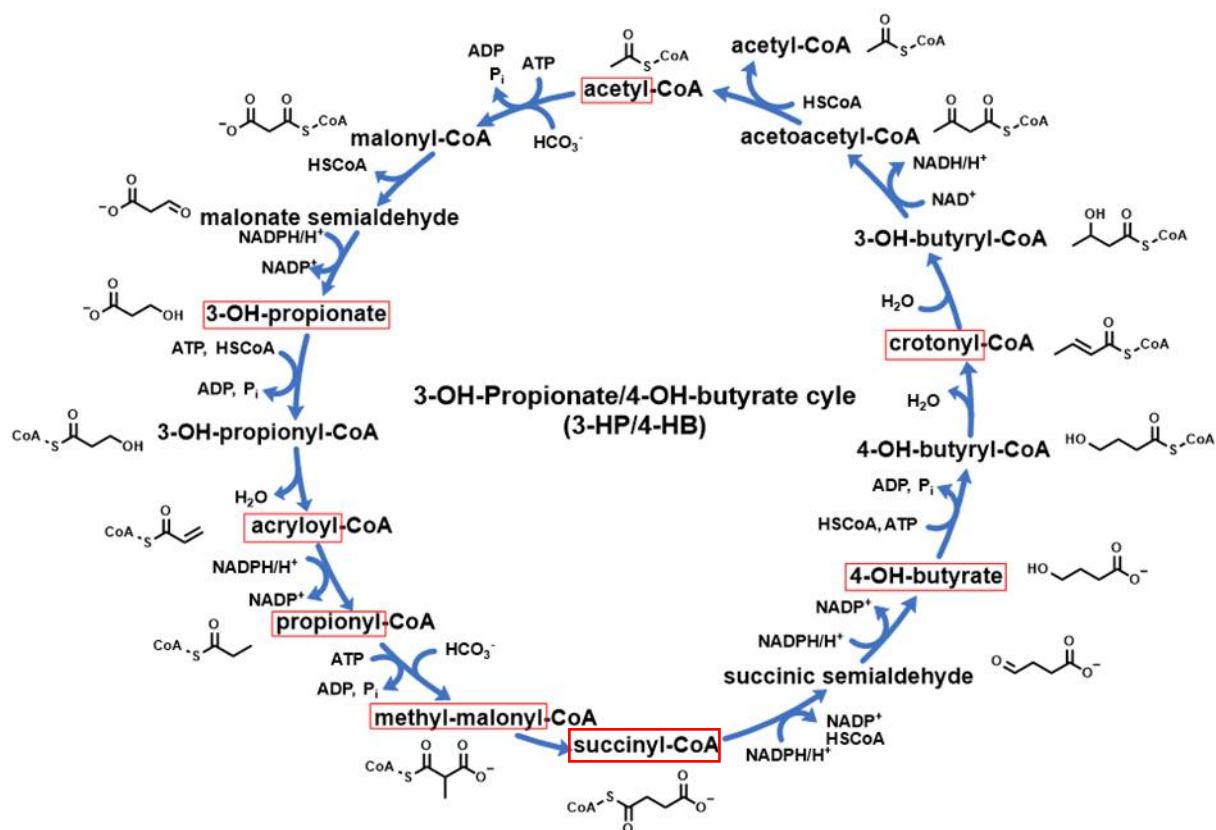

**Figure S4: 3-Hydroxypropionate/4-hydroxybutyrate cycle<sup>15</sup>.** Metabolites highlighted by red boxes correspond to products of the NiS/HC≡CH/CO system. Graphics partly adapted from<sup>15,42</sup>.

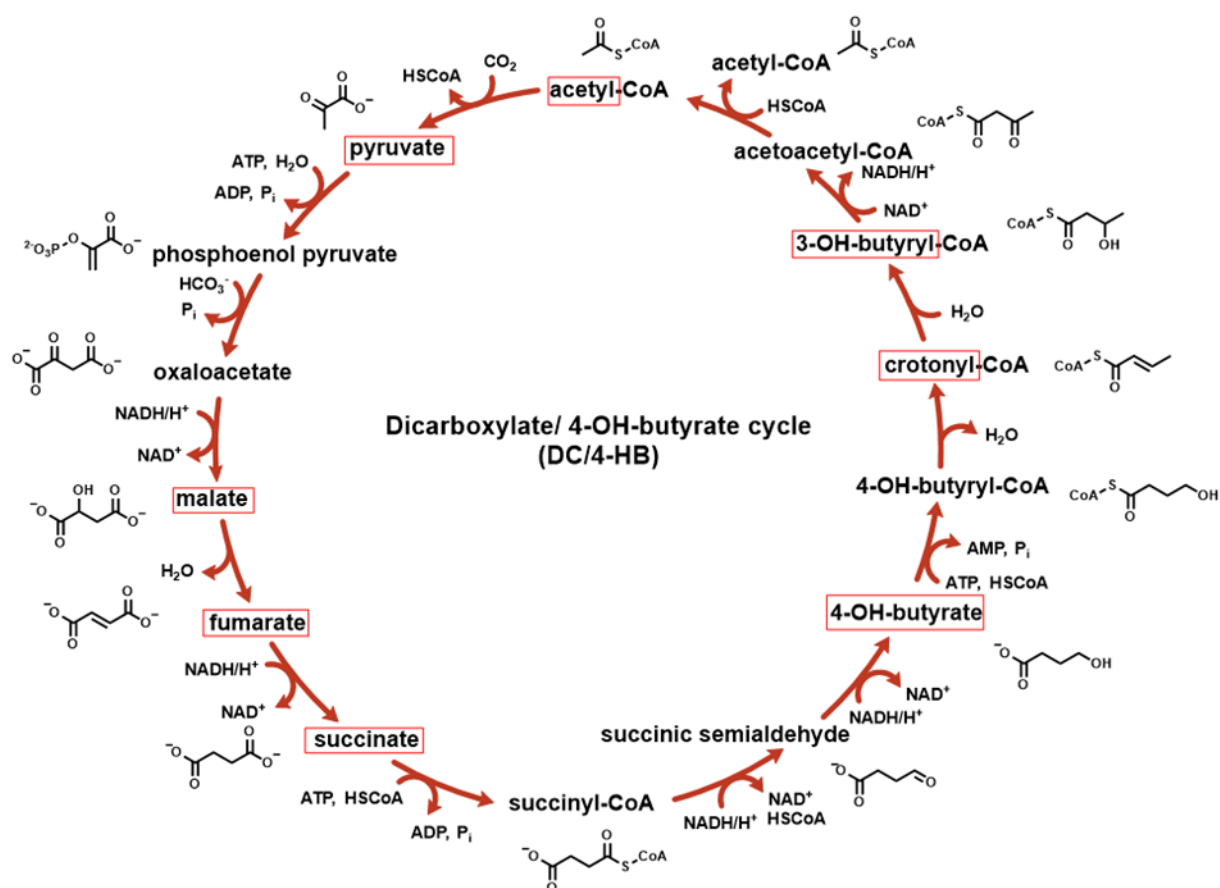

**Figure S5: Dicarboxylate/4-Hydroxybutyrate cycle<sup>16</sup>.** Metabolites highlighted by red boxes correspond to products of the NiS/HC≡CH/CO system. Graphics partly adapted from<sup>16,43</sup>.

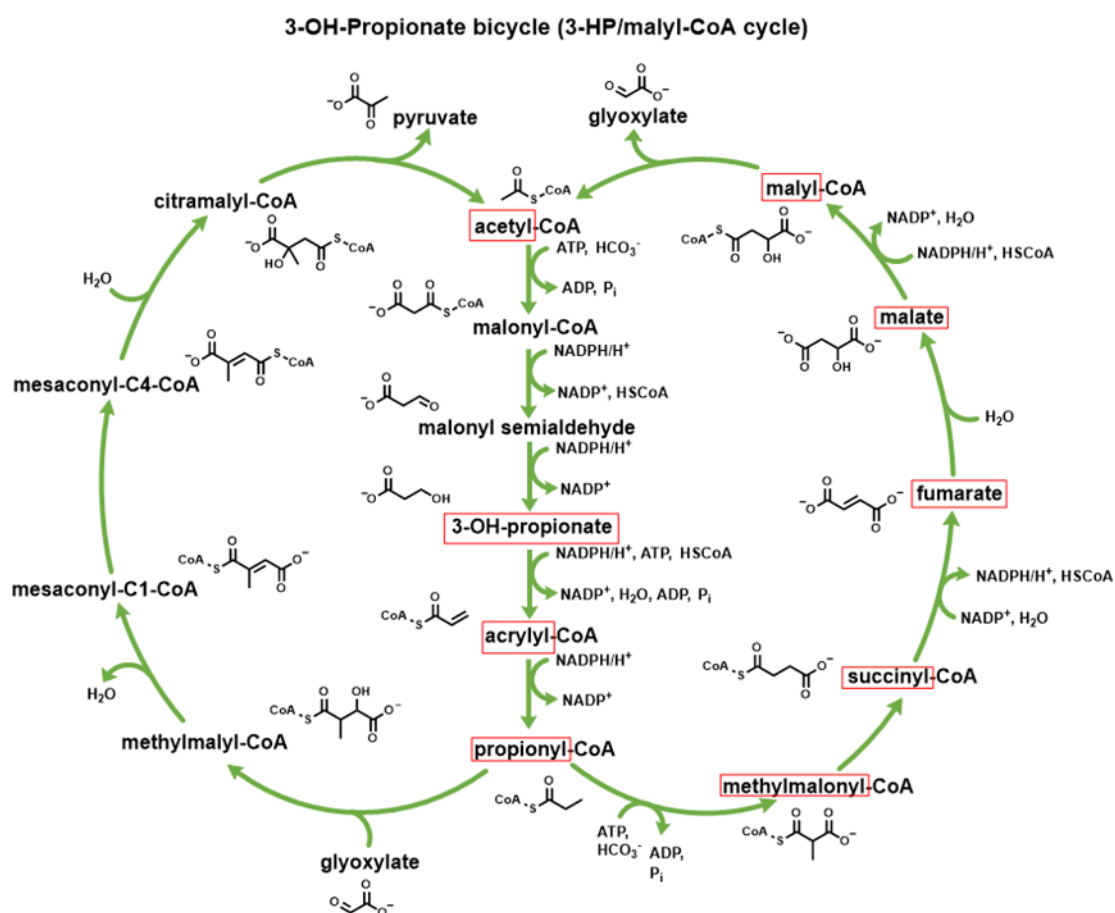

**Figure S6: 3-Hydroxypropionate bicycle<sup>17</sup>.** Metabolites highlighted by red boxes correspond to products of the NiS/HC≡CH/CO system. Graphics partly adapted from<sup>17,44</sup>.



### Additional references

39. Ljungdahl, L. G. The Autotrophic Pathway of Acetate Synthesis in Aceto Genic Bacteria. *Ann. Rev. Microbiol.* **1986**, *40*, 415-50.
40. Kitadai, N.; Kameya, M.; Fujishima, K. Origin of the reductive tricarboxylic acid (rtca) cycle-type CO<sub>2</sub> fixation: A perspective. *Life (Basel)* **2017**, *7*, 16.
41. Wahlund, T. M.; Tabita, F. R. The Reductive Tricarboxylic Acid Cycle of Carbon Dioxide Assimilation: Initial Studies and Purification of ATP-Citrate Lyase from the Green Sulfur Bacterium *Chlorobium tepidum*. *J Bacteriol* **1997**, *179*, 4859-4867.
42. Tully, B. J., Nelson, W. C.; Heidelberg, J. F. Metagenomic analysis of a complex marine planktonic thaumarchaeal community from the Gulf of Maine. *Environ. Microbiol.* **2012**, *14*, 254–267.
43. Berg, I. A.; Kockelkorn D.; Ramos-Vera W. H.; Say R. F.; J. Zarzycki; Hügler M.; Alber B. E.; Fuchs G. Autotrophic carbon fixation in archaea. *Nat. Rev. Microbiol.* **2010**, *8*, 447-460.
44. Zarzycki, J., Brecht, V., Müller, M.; Fuchs, G. Identifying the missing steps of the autotrophic 3-hydroxypropionate CO<sub>2</sub> fixation cycle in *Chloroflexus aurantiacus*. *PNAS* **2009**, *106*, 21317-21322.
